# Supplementary material for: Evaluating the Phenotypic and Genomic Characterization of Some Egyptian Phages Infecting Shiga Toxin-Producing Escherichia coli O157:H7 for the Prospective Application in Food Bio-Preservation
Source: MDPI journal article supplement (doi:10.3390/biology11081180), 2022-08-05
Supplement: s1 [file s1]

## Supplementary Materials

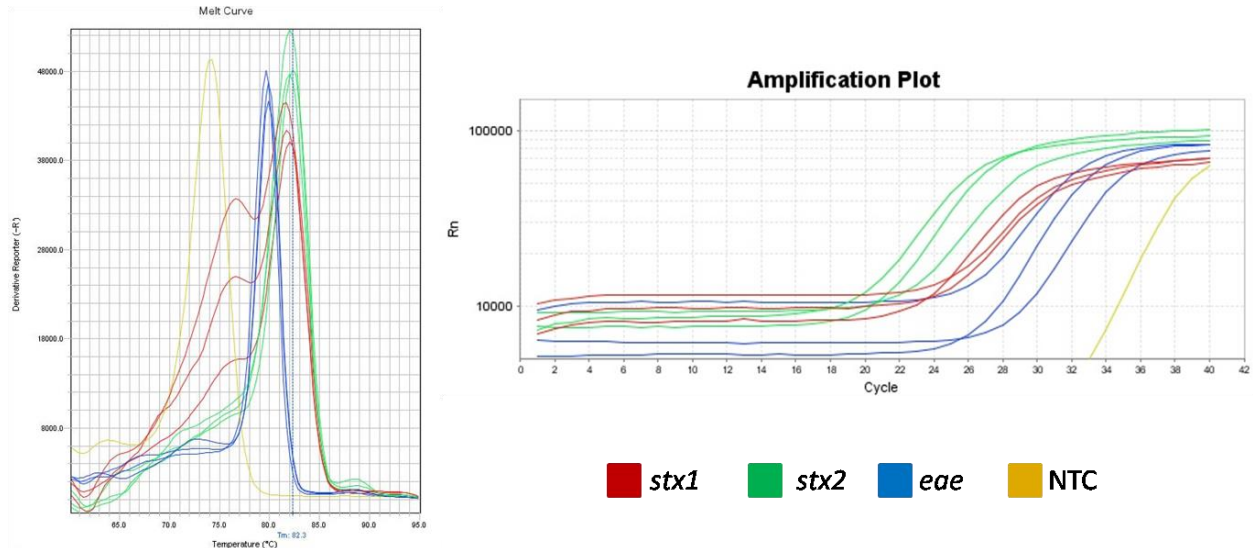

**Figure S1.** Quantitative real time PCR (RT-PCR) results. The amplification plot and melting curves of *stx1*, *stx2* and *eaeA* gene expression. The RT-PCR confirmed the presence and successful expression of the three tested genes in Shiga toxin-producing *E. coli* O157:H7 wild type strain 93111.

**Table S1.** Analysis of structural proteins of selected four phages.

| Bands       | Ladder     |              | STEC P1    |              | STEC P2    |              | STEC P3    |              | STEC P4    |              |
|-------------|------------|--------------|------------|--------------|------------|--------------|------------|--------------|------------|--------------|
|             | Band M. W. | Band density |
| 1           | 170        | 40,338       | 119.22     | 30,457       | 120.63     | 31,146       | 122.39     | 28,673       | 142.51     | 30,279       |
| 2           | 130        | 40,530       | 109.69     | 28,263       | 106.51     | 30,677       | 106.16     | 29,054       | 126.28     | 31,884       |
| 3           | 100        | 44,272       | 104.75     | 28,393       | 98.75      | 27,505       | 100.16     | 29,191       | 121.34     | 34,633       |
| 4           | 70         | 39,537       | 97.33      | 26,650       | 92.39      | 30,870       | 90.98      | 34,237       | 107.92     | 33,990       |
| 5           | 55         | 43,729       | 88.51      | 32,704       | 84.63      | 28,687       | 79.33      | 28,671       | 100.16     | 31,356       |
| 6           | 40         | 37,560       | 75.1       | 25,376       | 74.04      | 29,967       | 72.98      | 31,661       | 91.69      | 33,480       |
| 7           | 35         | 40,951       | 69.09      | 32,328       | 63.8       | 27,313       | 66.27      | 31,211       | 81.1       | 33,656       |
| 8           | 25         | 39,633       | 62.03      | 29,406       | 58.51      | 27,255       | 53.21      | 37,674       | 75.45      | 33,593       |
| 9           | 15         | 39,455       | 48.62      | 36,924       | 50.39      | 38,420       | 36.27      | 27,794       | 69.09      | 40,836       |
| 10          | 10         | 41,798       | 26.38      | 24,381       | 28.15      | 25,269       | 29.56      | 26,648       | 63.09      | 32,507       |
| 11          | -          | -            | 15.44      | 23,731       | 22.15      | 23,486       | 19.68      | 25,493       | 55.33      | 41,303       |
| 12          | -          | -            | 7.68       | 20,662       | 13.68      | 27,939       | 14.74      | 25,089       | 46.5       | 30,746       |
| 13          | -          | -            | 1.32       | 22,179       | 7.68       | 24,406       | 9.44       | 26,305       | 37.68      | 32,384       |
| 14          | -          | -            | -          | -            | 1.32       | 25,214       | -          | -            | 30.97      | 34,618       |
| 15          | -          | -            | -          | -            | -          | -            | -          | -            | 15.09      | 34,611       |
| 16          | -          | -            | -          | -            | -          | -            | -          | -            | 6.62       | 34,040       |
| 17          | -          | -            | -          | -            | -          | -            | -          | -            | NA         | 38,273       |
| Total M. W. | 480        | -            | 825.16     | -            | 822.63     | -            | 801.17     | -            | 1170.82    | -            |

**Table S2.** The closest phages to *Escherichia* phage ST2 obtained from the NCBI GenBank.

| S | Genome                                    | Size   | GC % | Query cover % | E value | Identity % | Accession No. | ANI   | DDH  |
|---|-------------------------------------------|--------|------|---------------|---------|------------|---------------|-------|------|
| 1 | <i>Escherichia</i> -phage vB_EcoM_PhAPEC2 | 167318 | 37.7 | 96            | 0       | 98.92      | KF562341.1    | 98.1  | 81.6 |
| 2 | <i>Shigella</i> -phage Shf125875          | 169062 | 37.6 | 94            | 0       | 97.38      | KM407600.1    | 96.58 | 67.4 |
| 3 | <i>Escherichia</i> -phage SF              | 168695 | 37.6 | 95            | 0       | 97.46      | MH359124.1    | 96.59 | 69.3 |
| 4 | <i>Escherichia</i> -phage vB_EcoM_WFK     | 164590 | 37.6 | 90            | 0       | 97.61      | MK373775.1    | 96.82 | 69.6 |
| 5 | <i>Escherichia</i> -phage vB_EcoM_WFL6982 | 164279 | 37.6 | 90            | 0       | 97.6       | MK373774.1    | 96.82 | 69.5 |
| 6 | Enterobacteria-phage RB69                 | 167560 | 37.7 | 94            | 0       | 97.47      | AY303349.1    | 96.65 | 69.4 |
| 7 | <i>Escherichia</i> -phage vB_EcoM_JS09    | 169148 | 37.6 | 92            | 0       | 96.55      | KF582788.2    | 95.89 | 55.8 |
| 8 | <i>Shigella</i> -phage phi25-307          | 167544 | 37.5 | 91            | 0       | 96.44      | MG589383.1    | 95.74 | 56   |
| 9 | <i>Shigella</i> -phage JK42               | 168306 | 37.6 | 91            | 0       | 96.33      | MK962756.1    | 95.95 | 55.3 |

**Table S3.** The closest phages to *Escherichia* phage ST4 obtained from the NCBI GenBank.

| S | Genome                                   | Size   | GC % | Query cover % | E value | Identity % | Accession No. | ANI   | DDH  |
|---|------------------------------------------|--------|------|---------------|---------|------------|---------------|-------|------|
| 1 | <i>Escherichia</i> phage vB_EcoP_PhAPEC7 | 71,778 | 43.3 | 86            | 0       | 95         | KF562340.1    | 93.85 | 80.4 |
| 2 | <i>Escherichia</i> phage vB_EcoP_PhAPEC5 | 71,248 | 43.5 | 83            | 0       | 95         | KF192075.1    | 93.66 | 75.2 |
| 3 | <i>Escherichia</i> phage vB_EcoP_G7C     | 72,917 | 43.4 | 83            | 0       | 95         | HQ259105.1    | 93.16 | 77.3 |
|   | <i>Escherichia</i> phage PD38            | 72,213 | 42.9 | 84            | 0       | 93         | MH669274.1    | 91.76 | 75.1 |
| 4 | <i>Escherichia</i> phage phi G17         | 68,270 | 43.5 | 80            | 0       | 93         | MH358458.1    | 92.61 | 73.5 |
| 6 | Enterobacteria phage Bp4                 | 72,583 | 42.9 | 84            | 0       | 93         | KJ135004.2    | 91.8  | 75.4 |
| 7 | ECBP1                                    | 69,855 | 42.7 | 81            | 0       | 93         | JX415535.1    | 91.46 | 77.2 |
| 8 | <i>Escherichia</i> phage PGN829.1        | 74,437 | 42.9 | 87            | 0       | 92         | MH733496.1    | 91.86 | 77.8 |
| 9 | <i>Enterobacter</i> phage IME11          | 72,570 | 43.1 | 81            | 0       | 92         | JX880034.1    | 91.61 | 73.8 |
